# Supplementary material for: Measurement of respiratory rate using wearable devices and applications to COVID-19 detection
Source: PubMed Central journal article supplement (PMC8443549; doi:10.1038/s41746-021-00493-6), 2021-09-15
Supplement: 41746_2021_493_MOESM1_ESM.pdf [file 41746_2021_493_MOESM1_ESM.pdf]

## Supplementary Text

Supplementary Table I shows the details of the 2 experiments conducted to validate the respiratory rate computations. Experiment A was conducted at Sleep Med in Columbia, SC, from Oct 17, 2019 to Nov 6, 2019. Experiment B was conducted remotely, by shipping equipment to the homes of participants, from March 9, 2020 to May 29, 2020. Participants in Experiment A wore Fitbit devices on both wrists, while participants in Experiment B wore a Fitbit device on one wrist only. We excluded participants with severe sleep apnea (Apnea-Hypopnea Index  $\geq 30$ ). The columns are: (i) participant ID, (ii) age, (iii) sex, (iv) experiment (A or B), (v) night of measurement (1,2, or 3), (vi) apnea-hypopnea index, (vii) wrist (left, right, or unknown), (viii) predicted respiratory rate, and (ix) true respiratory rate.

### Validation of respiratory rate

| ID | Age (yr) | Sex (M/F) | Expt (A/B) | Night (1/2/3) | AHI  | Wrist (L/R/-) | Pred. Rate ( $\text{min}^{-1}$ ) | True Rate ( $\text{min}^{-1}$ ) | ID | Age (yr) | Sex (M/F) | Expt (A/B) | Night (1/2/3) | AHI  | Wrist (L/R/-) | Pred. Rate ( $\text{min}^{-1}$ ) | True Rate ( $\text{min}^{-1}$ ) |
|----|----------|-----------|------------|---------------|------|---------------|----------------------------------|---------------------------------|----|----------|-----------|------------|---------------|------|---------------|----------------------------------|---------------------------------|
| 1  | 35-39    | F         | A          | 1             | 9.2  | L             | 16                               | 16.4                            | 13 | 45-49    | F         | A          | 1             | 1.5  | R             | 14.4                             | 14.9                            |
| 1  | 35-39    | F         | A          | 1             | 9.2  | R             | 15.6                             | 16.4                            | 14 | 35-39    | M         | A          | 1             | 2.7  | L             | 14.4                             | 15.2                            |
| 2  | 55-59    | F         | A          | 1             | 17.3 | L             | 15.6                             | 15.9                            | 14 | 35-39    | M         | A          | 1             | 2.7  | R             | 15                               | 15.2                            |
| 2  | 55-59    | F         | A          | 1             | 17.3 | R             | 15.4                             | 15.9                            | 15 | 45-49    | M         | B          | 1             | 13   | -             | 13.8                             | 13.8                            |
| 3  | 50-54    | F         | A          | 1             | 1.6  | L             | 12.4                             | 12.4                            | 15 | 45-49    | M         | B          | 2             | 13.2 | -             | 14.2                             | 14.6                            |
| 3  | 50-54    | F         | A          | 1             | 1.6  | R             | 12.4                             | 12.4                            | 16 | 50-54    | M         | B          | 2             | 4.2  | -             | 18.2                             | 18.1                            |
| 4  | 65-69    | F         | A          | 1             | 5.3  | L             | 13                               | 13.5                            | 17 | 30-34    | F         | B          | 1             | 25   | -             | 17.8                             | 16.1                            |
| 4  | 65-69    | F         | A          | 1             | 5.3  | R             | 12.8                             | 13.5                            | 17 | 30-34    | F         | B          | 2             | 12.1 | -             | 16.8                             | 16.6                            |
| 5  | 55-59    | F         | A          | 1             | 10   | L             | 13.8                             | 14.2                            | 17 | 30-34    | F         | B          | 3             | 14.6 | -             | 17                               | 17.1                            |
| 5  | 55-59    | F         | A          | 1             | 10   | R             | 14                               | 14.2                            | 18 | 35-39    | M         | B          | 1             | 4.8  | -             | 13.2                             | 13.6                            |
| 6  | 55-59    | M         | A          | 1             | 26   | L             | 13.4                             | 13.1                            | 18 | 35-39    | M         | B          | 2             | 5.6  | -             | 13.4                             | 13.7                            |
| 6  | 55-59    | M         | A          | 1             | 26   | R             | 12.8                             | 13.1                            | 19 | 50-54    | M         | B          | 1             | 7.6  | -             | 17.4                             | 17.5                            |
| 7  | 55-59    | F         | A          | 1             | 7.5  | L             | 20.2                             | 20.2                            | 19 | 50-54    | M         | B          | 2             | 9.8  | -             | 17.4                             | 17.3                            |
| 7  | 55-59    | F         | A          | 2             | 26.3 | L             | 17.4                             | 17.6                            | 20 | 70-74    | F         | B          | 1             | 18.5 | -             | 15.4                             | 15.2                            |
| 7  | 55-59    | F         | A          | 2             | 26.3 | R             | 16.6                             | 17.6                            | 21 | 45-49    | M         | B          | 1             | 20.1 | -             | 16.4                             | 16.9                            |
| 8  | 50-54    | M         | A          | 1             | 0.6  | L             | 13                               | 13.6                            | 21 | 45-49    | M         | B          | 2             | 17.2 | -             | 16.8                             | 16.9                            |
| 8  | 50-54    | M         | A          | 1             | 0.6  | R             | 13                               | 13.6                            | 22 | 50-54    | M         | B          | 2             | 14.4 | -             | 16.2                             | 16.5                            |
| 9  | 50-54    | F         | A          | 1             | 16.9 | L             | 17.4                             | 17.8                            | 23 | 50-54    | F         | B          | 1             | 4.6  | -             | 12.4                             | 13.3                            |
| 9  | 50-54    | F         | A          | 1             | 16.9 | R             | 17.4                             | 17.8                            | 23 | 50-54    | F         | B          | 2             | 5.8  | -             | 12.8                             | 13.3                            |
| 10 | 45-49    | M         | A          | 1             | 27.1 | L             | 14.2                             | 14.1                            | 24 | 35-39    | F         | B          | 1             | 14.2 | -             | 17.8                             | 17.4                            |
| 10 | 45-49    | M         | A          | 1             | 27.1 | R             | 14                               | 14.1                            | 24 | 35-39    | F         | B          | 2             | 12.4 | -             | 18.2                             | 17.7                            |
| 11 | 40-44    | F         | A          | 1             | 2.6  | L             | 15.8                             | 16.1                            | 25 | 40-44    | M         | B          | 1             | 13.8 | -             | 18.2                             | 16.5                            |
| 11 | 40-44    | F         | A          | 1             | 2.6  | R             | 16                               | 16.1                            | 26 | 50-54    | F         | B          | 1             | 12.5 | -             | 15                               | 15                              |
| 12 | 40-44    | F         | A          | 1             | 5    | L             | 13.8                             | 15.3                            | 26 | 50-54    | F         | B          | 2             | 12.6 | -             | 15.6                             | 15.3                            |
| 12 | 40-44    | F         | A          | 1             | 5    | R             | 13.8                             | 15.3                            | 27 | 45-49    | M         | B          | 2             | 19.3 | -             | 12.6                             | 12.8                            |
| 13 | 45-49    | F         | A          | 1             | 1.5  | L             | 14.6                             | 14.9                            | 28 | 65-69    | M         | B          | 1             | 6.3  | -             | 13.8                             | 15.7                            |

Supplementary Table I: Details of experiments A and B. The columns are: participant ID, age, sex, experiment number (A or B), night of observation (1,2, or 3), apnea hypopnea index, wrist (left, right, or unknown), predicted respiratory rate, and true respiratory rate.
